# Supplementary material for: T Cell Response following Anti-COVID-19 BNT162b2 Vaccination Is Maintained against the SARS-CoV-2 Omicron B.1.1.529 Variant of Concern
Source: MDPI journal article supplement (doi:10.3390/v14020347), 2022-02-08
Supplement: s1 [file s1]

A

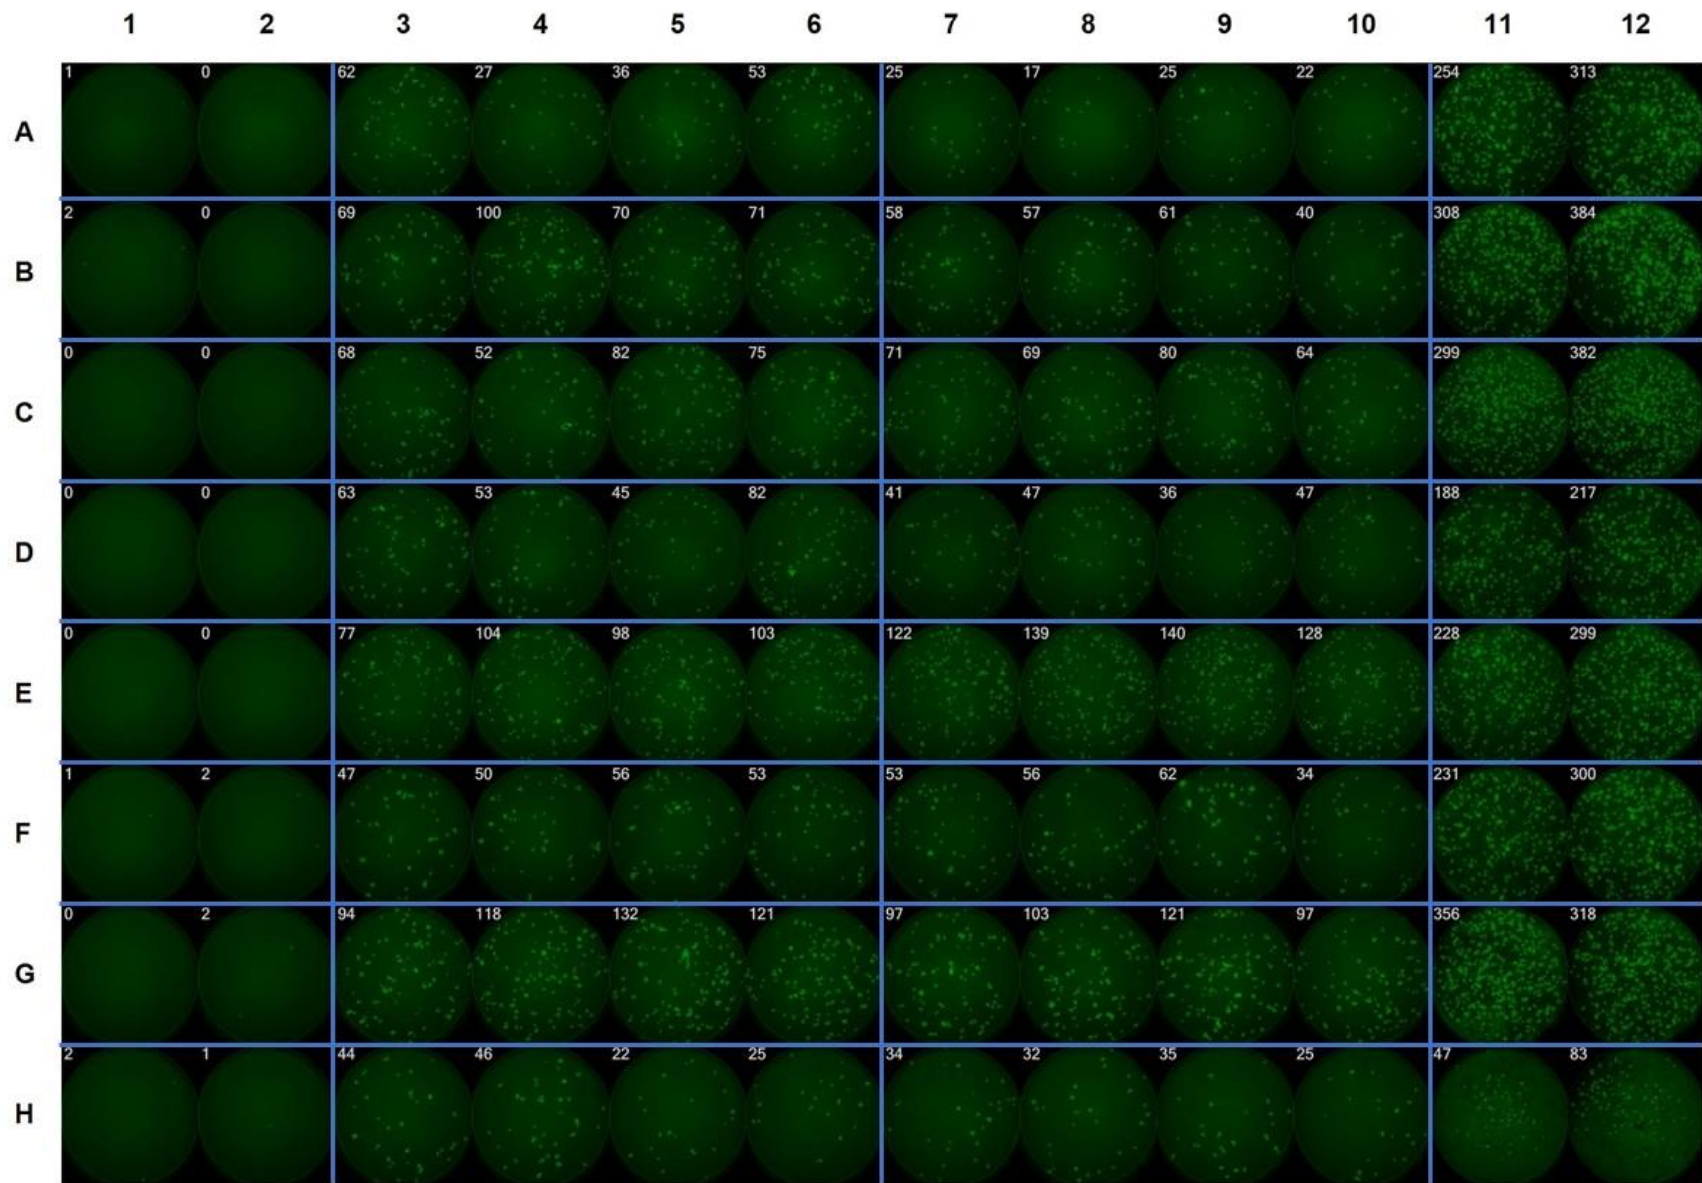

B

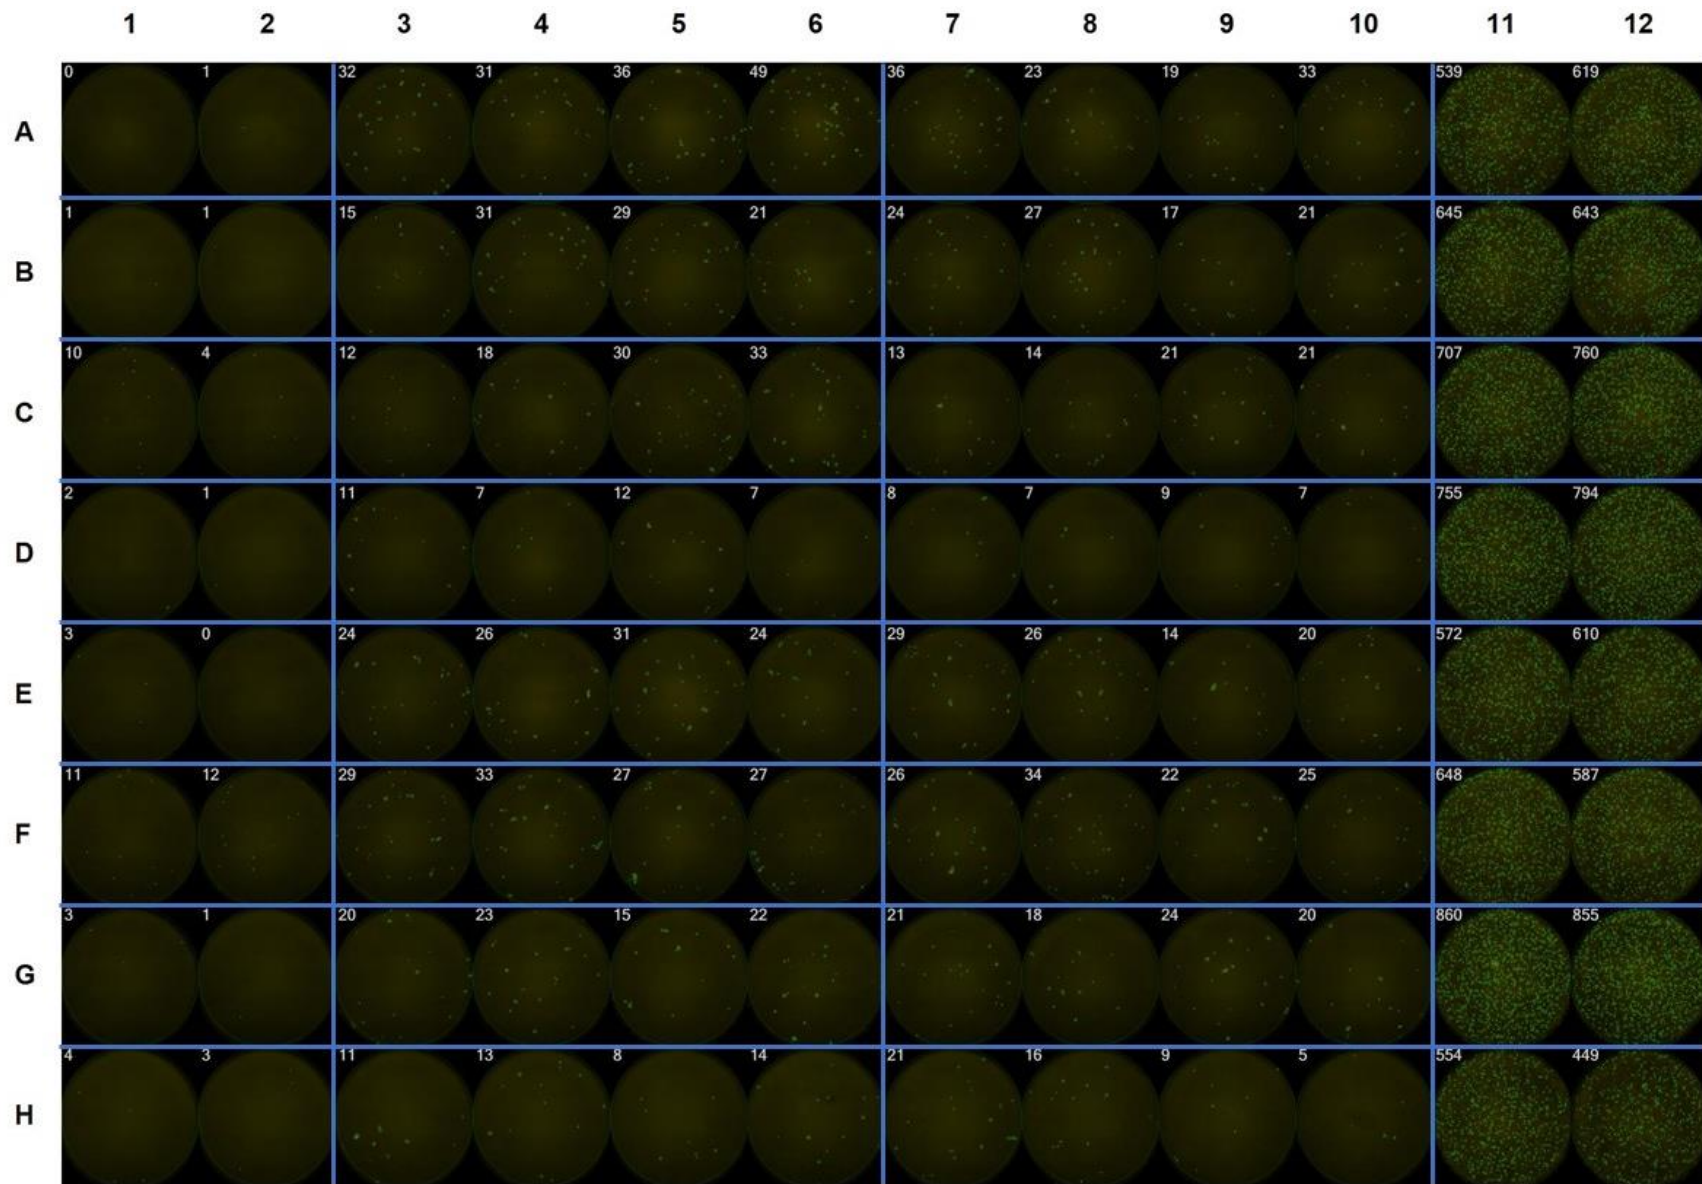



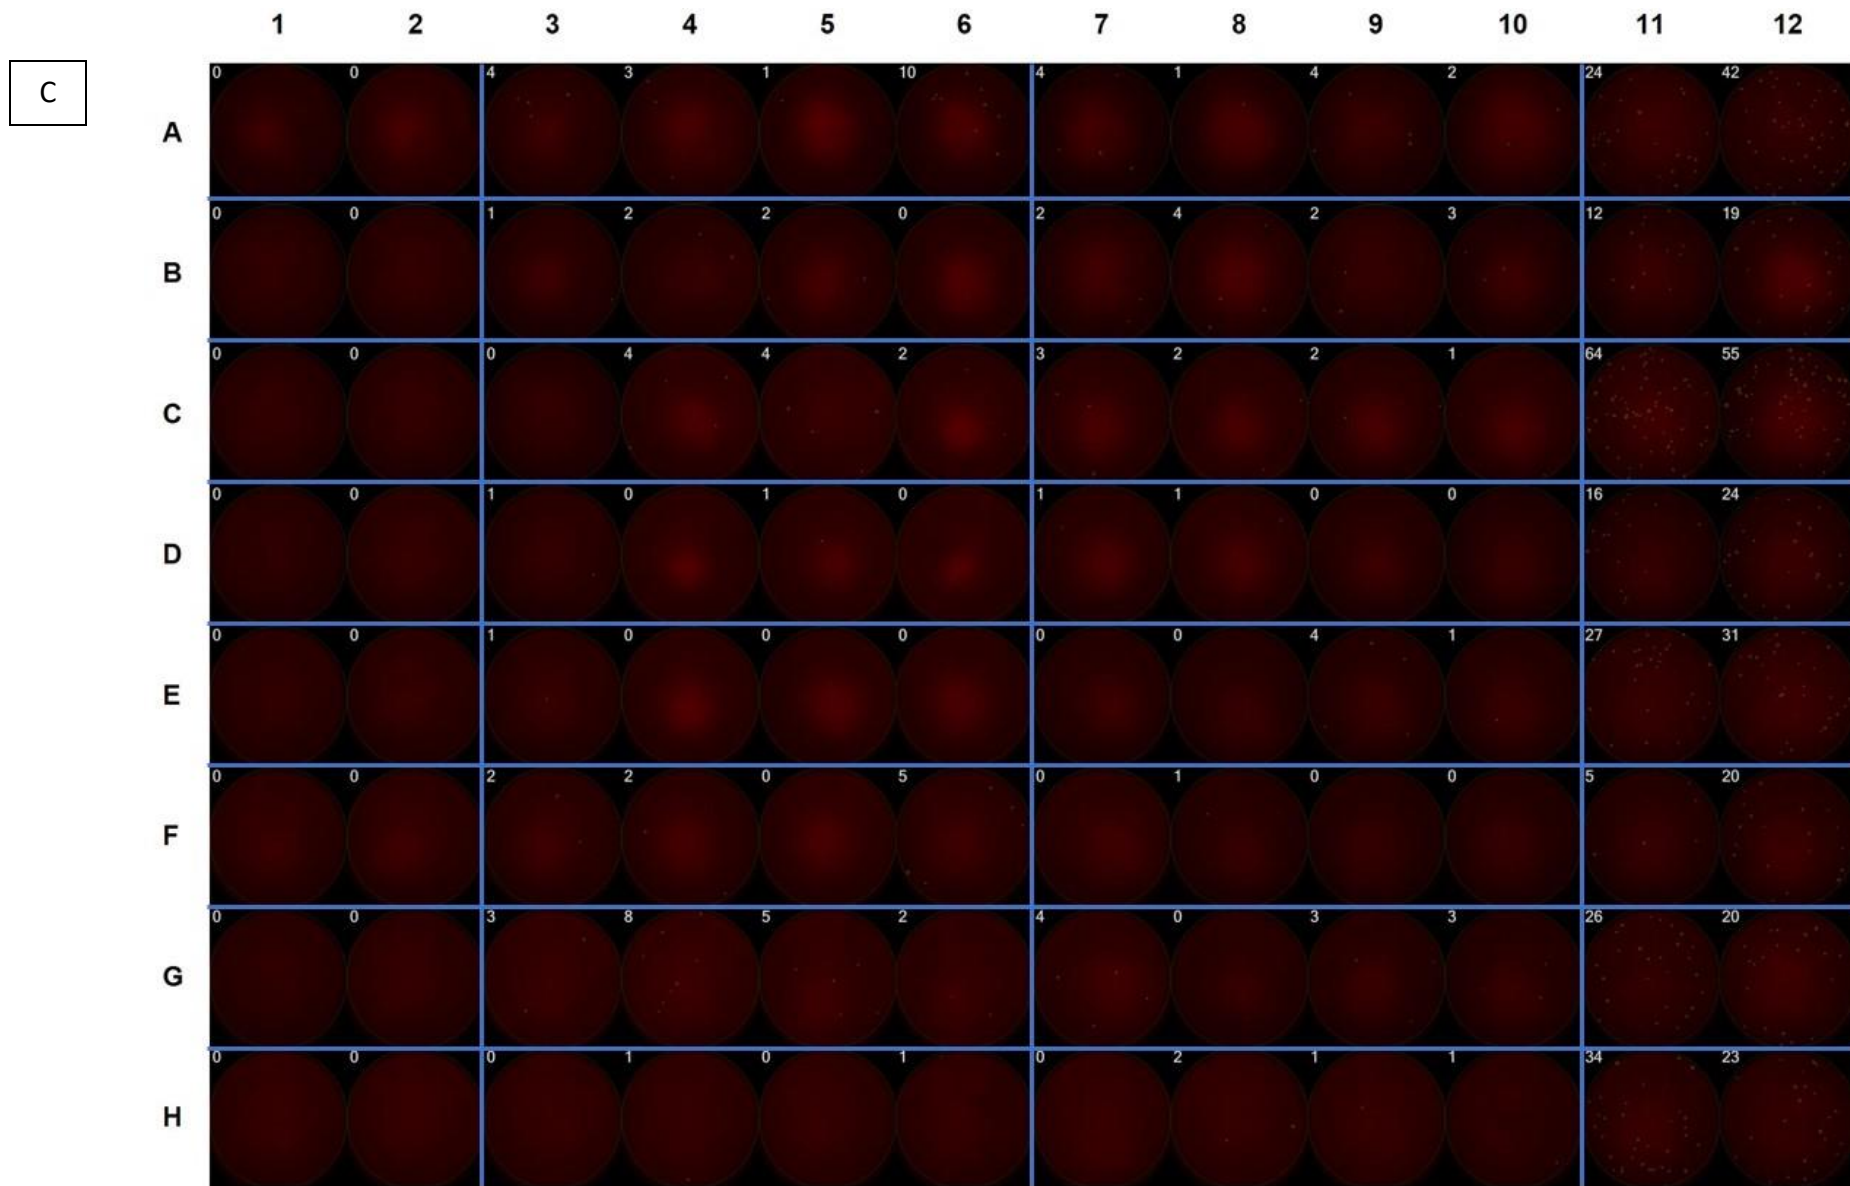

**Figure S1:** FluoroSpot plate layout and quantitation. PBMC ( $3 \times 10^5$  per well) were left unstimulated (columns 1, 2), stimulated with ancestral spike (lanes 3-6) or Omicron spike (lanes 7-10) overlapping peptide library pool, or stimulated with L-PHA ( $5 \mu\text{g/ml}$ ). IFN $\gamma$  (A), IL-10 (B) and IL-4 (C) producing cells were quantified and presented as spots per well. Each row (A-H) represent one individual donor (Donors 1-8).
